# Supplementary material for: A nickel(ii) complex under water-oxidation reaction: what is the true catalyst?
Source: Royal Society of Chemistry journal article supplement (doi:10.1039/c8dt03990a), 2018-11-26
Supplement: c8dt03990a1.pdf [file c8dt03990a1.pdf]

## Electronic Supplementary Information

## **A nickel(II) complex under water-oxidation reaction: What is the true catalyst?**

*Hadi Feizi,<sup>a</sup> Robabeh Bagheri,<sup>b</sup> Zvonko Jagličić,<sup>c</sup> Jitendra Pal Singh,<sup>d</sup> Keun Hwa Chae,<sup>d</sup>  
and Zhenlun Song<sup>b</sup> and Mohammad Mahdi Najafpour,<sup>\*a,e,f</sup>*

<sup>a</sup>Department of Chemistry, Institute for Advanced Studies in Basic Sciences (IASBS),  
Zanjan, 45137-66731, Iran

<sup>b</sup>Surface Protection Research Group, Surface Department, Ningbo Institute of Materials  
Technology and Engineering, Chinese Academy of Sciences, 519 Zhuangshi Road, Ningbo  
315201, China

<sup>c</sup>Institute of Mathematics, Physics and Mechanics & Faculty of Civil and Geodetic  
Engineering, University of Ljubljana, Jadranska 19, SI-1000 Ljubljana, Slovenia

<sup>d</sup>Advanced Analysis Center, Korea Institute of Science and Technology (KIST), Seoul  
02792, Republic of Korea

<sup>e</sup>Center of Climate Change and Global Warming, Institute for Advanced Studies in Basic  
Sciences (IASBS), Zanjan, 45137-66731, Iran

<sup>f</sup>Research Center for Basic Sciences & Modern Technologies (RBST), Institute for  
Advanced Studies in Basic Sciences (IASBS), Zanjan 45137-66731, Iran

\*Corresponding author; Phone: (+98) 24 3315 3201; E-mail: [mmnajafpour@iasbs.ac.ir](mailto:mmnajafpour@iasbs.ac.ir)

## **Experimental Section**

### **Materials**

All reagents and solvents were obtained from commercial sources and used without further purification. Nickel(II) phthalocyanine-tetrasulfonate tetrasodium salt (**1**) and fluorine tin oxide coated glass (FTO) were purchased from Sigma-Aldrich.

### **Characterization**

SEM was carried out with an LEO 1430VP. The X-ray powder patterns were recorded with a Bruker D8 ADVANCE diffractometer ( $\text{CuK}_\alpha$  radiation). Visible spectra were recorded by a mini spectrophotometer (Pooyesh Tadbir Karaneh (Phystec), Iran). AFM was measured by Dualscope/ Rasterscope C26, DME, Denmark. Ni L-edge NEXAFS was measured at 10D XAS KIST beamline Pohang Light source. Magnetization was measured between 2 K and 300 K in a constant magnetic field of 10 mT, and as a function of magnetic field at 300 K and 2 K using a Quantum Design MPMS-XI-5 SQUID magnetometer.

### **Experimental Details for X-ray absorptions**

The extended edge X-ray absorption fine structure (EXAFS) measurements on HF-Ni and reference materials (NiO and Ni) were performed at the hard X-ray 1D XAS KIST-PAL beamline, Pohang accelerator laboratory, operating at 3.0 GeV with a maximum storage current of 320 mA. 1D XAS KIST-PAL beamline is a bending magnet X-ray Scattering (XRS)

beamline which uses Si(111) double crystal monochromator to give a wide range of monochromatic energies (4-16 keV). To measure EXAFS spectra of these materials, higher harmonics were removed by detuning incident beam intensity to 60% of maximum intensity. The ionization chamber filled with He was used to record the intensity of the incident X-rays. The fluorescence EXAFS signal was measured by a passivated implanted planar silicon (PIPS) detector. Before the measurement, reference foil (Ni) is used for energy calibration. Under stationary conditions, extended X-ray absorption fine-structure (EXAFS) measurements were performed at the Ni *K*- edge in the step scanning mode.

The program Athena was used to identifying the beginning of the absorption edge ( $E_0$ ), fit pre- and post-edge backgrounds, and hence to obtain the normalized absorbance  $\chi$  as a function of the modulus of the photoelectron wave vector  $k$ . The fitting was carried out using ARTEMIS in the  $k$  range 3–10.5 Å. The EXAFS data is Fourier transformed to R-space to investigate the atomic structure and relative bond-lengths with respect to absorbing atoms. The theoretical structure for reference oxides was generated using the ATOM. In the fitting, values of coordination number ( $N$ ), bond length ( $R_i$ ) and Debye-Waller ( $\sigma^2$ ) factors are kept free. The parameter  $\epsilon_0$ , which is a correction to edge energy, was free to vary in all fitting. The errors in the fit parameters of  $R_i$  and  $\sigma^2$  were obtained from 90% of happiness factor as calculated in IFEFFIT.

## **Electrochemistry**

Electrochemical experiments were performed using an EmStat<sup>3+</sup> from PalmSens (Netherlands). Cyclic voltammetry studies were carried out with a conventional three-electrode setup, in which FTO, or Hg|HgO, and a platinum foil served as working, the reference and the auxiliary electrodes, respectively. All potentials in this project were reported vs. Ag|AgCl|KCl<sub>sat</sub>. The distance between two opposite sides of the FTO electrode was measured by a digital caliper MarCal 16ER model (Mahr, Germany). The temperature was measured by Laserliner 082 (Germany).

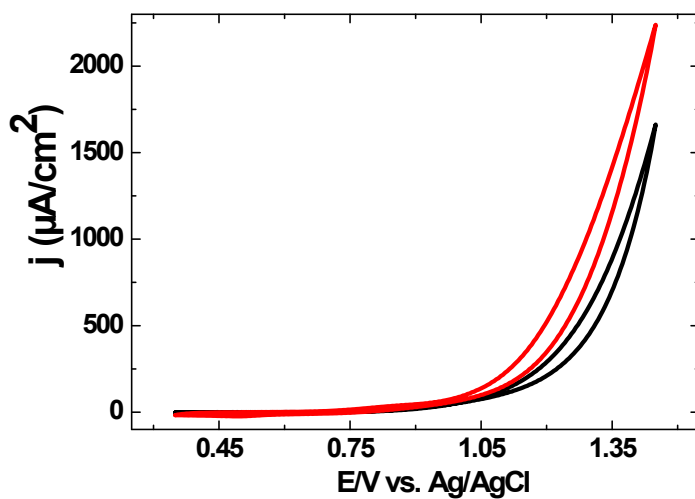

**Figure S1** | CV for the FTO after 250 continuous CVs in the presence (red) and in the absence (black) of **1** (0.51 mM) in phosphate buffer (20.0 mL; 0.25 M) at pH = 11.0 and with scan rate 50 mV/s. These CVs were obtained in phosphate buffer (20.0 mL; 0.25 M) at pH = 11.0 and with scan rate 50 mV/s.

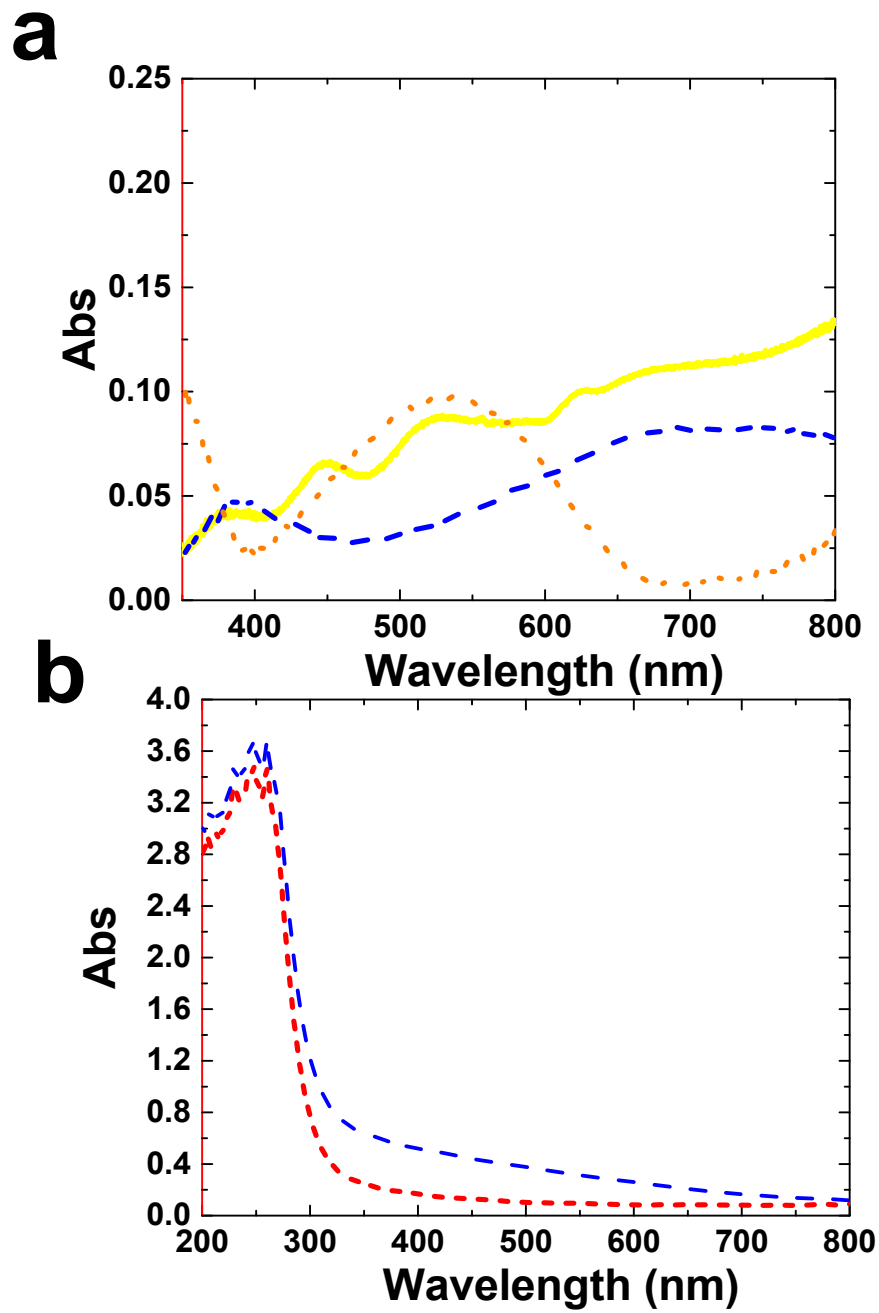

Figure S2 | UV-visible spectra. UV-visible spectra for NiOOH (blue), NiO (orange) and NiOOH (yellow) after a few hours (a). UV-visible spectra for FTO (red) and FTO-1 (blue) (b).

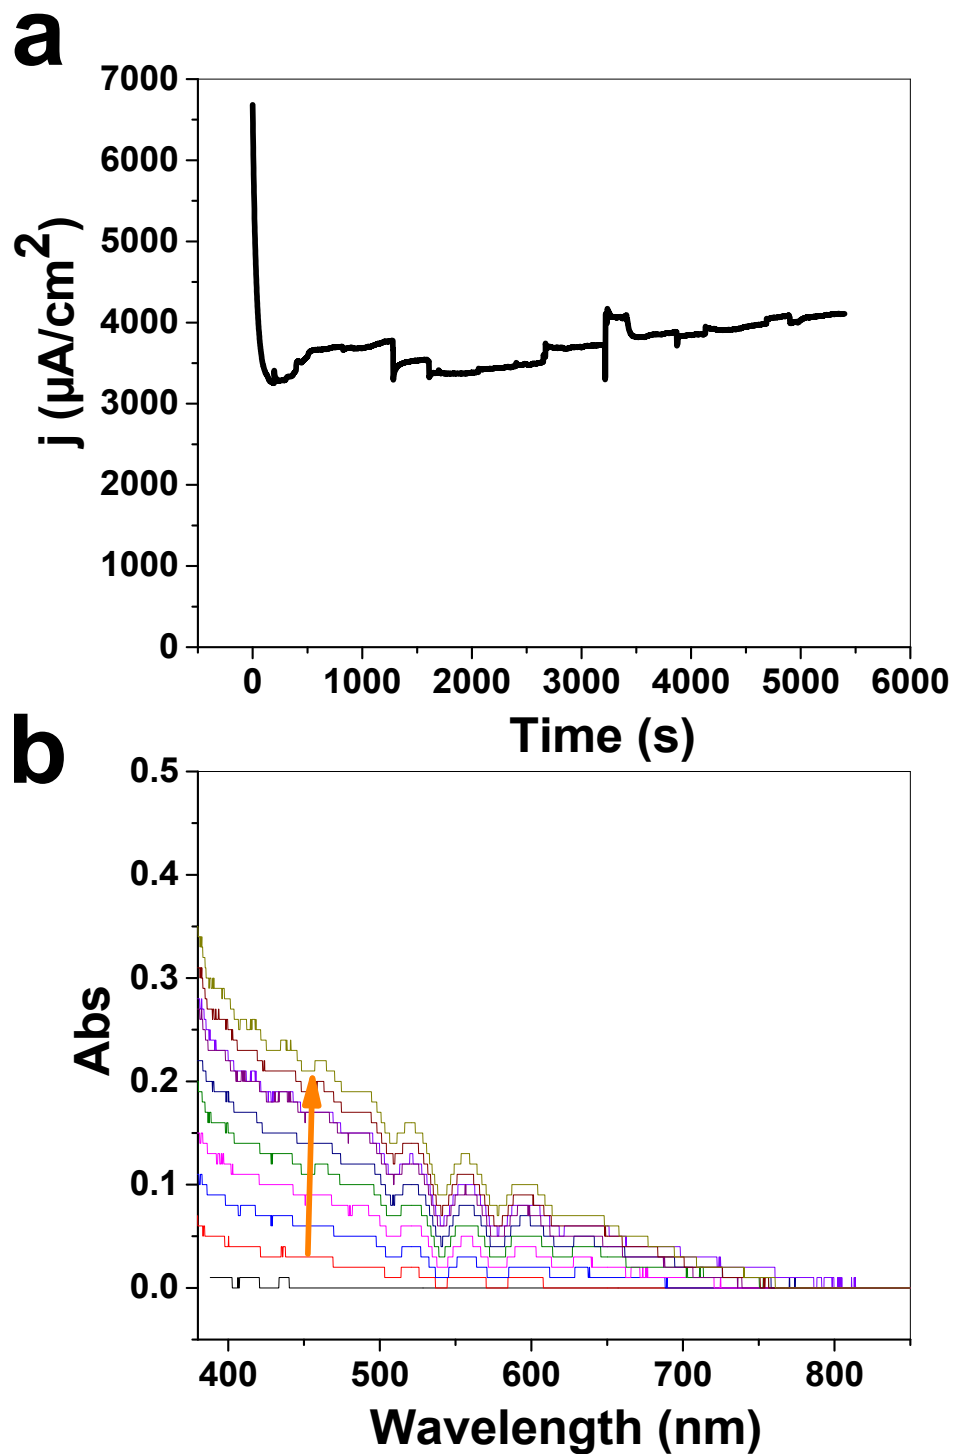

**Figure S3 | spectroelectrochemistry.** Spectroelectrochemistry in the presence of  $\text{Ni}(\text{ClO}_4)_2$  (saturated) in phosphate buffer (5.0 mL; 0.25 M) at pH = 11 (amperometric condition: 1.6 V) after 0, 10, 20, 30, 40, 50, 60, 70, 80, 90, 100, 113 minutes.



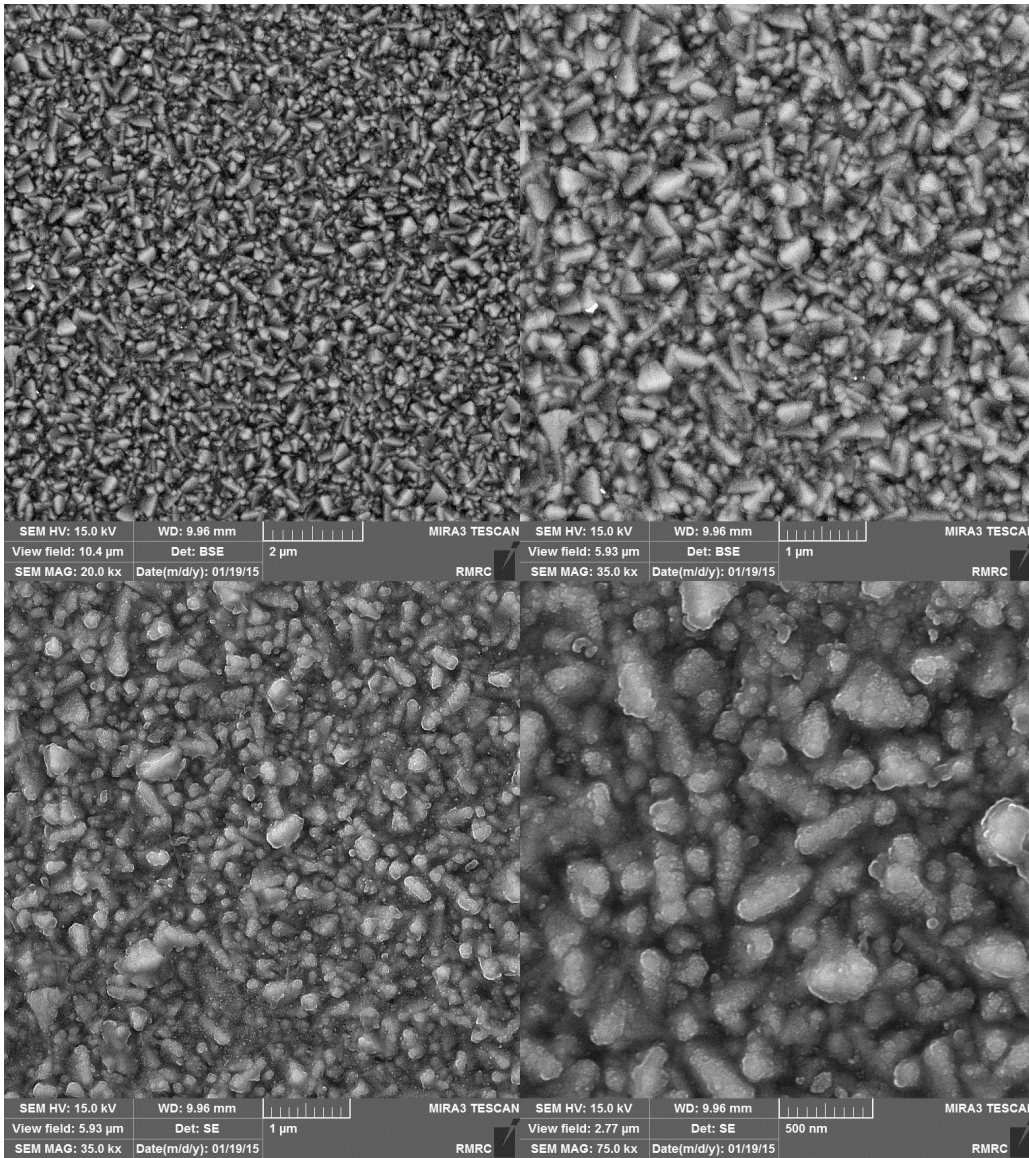

**Figure S4 | The SEM images. SEM images of fresh FTO.**

## Liquid chromatography-electrospray ionization- mass (LC-ESI)

### LC condition :

Column: Eclipse XDB-C18(4.6 x150 mm , 5µm )

Column temperature : 25°C

Mobile phase : A= Water +0.1% acetic acid

B= methanol

Gradient

| Time(min e) | B% | Flo w |
|-------------|----|-------|
| 0           | 5  | 0.3   |
| 25          | 60 | 0.3   |
| 40          | 10 | 0.3   |
|             | 0  |       |

Flow rate: 0.3 ml/min

Injection volumes: 10µL

### MS condition :

Mode : positive ESI using the Agilent G6410 Triple Quadrapole Mass spectrometer

Nebulizer : 15 psi

Drying gas flow : 6 ml/min

V capillary : 4500V

Drying gas temperature: 300°C

Dwell time: 500msec

Fragmentor : 135 v

## Qualitative Analysis Report

|                        |                           |                               |                         |
|------------------------|---------------------------|-------------------------------|-------------------------|
| <b>Data Filename</b>   | fazie-960306-positive-1.d | <b>Sample Name</b>            | fazie-960306-positive-1 |
| <b>Sample Type</b>     | Sample                    | <b>Position</b>               | Vial 1                  |
| <b>Instrument Name</b> | Instrument 1              | <b>User Name</b>              |                         |
| <b>Acq Method</b>      |                           | <b>IRM Calibration Status</b> | Success                 |
| <b>DA Method</b>       | Default.m                 | <b>Comment</b>                |                         |

### User Chromatograms

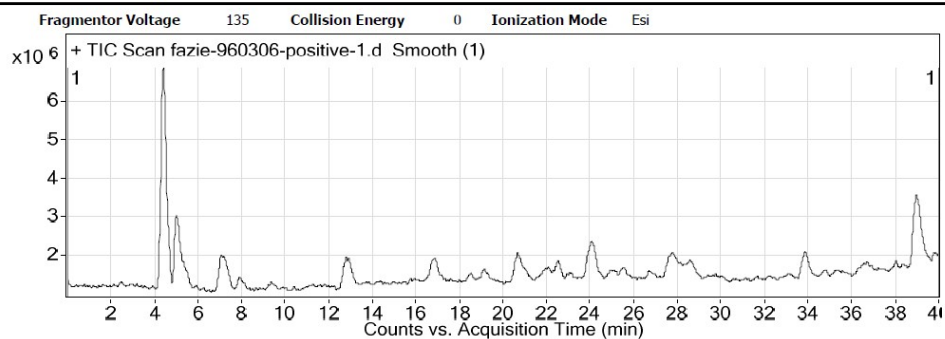

### User Spectra

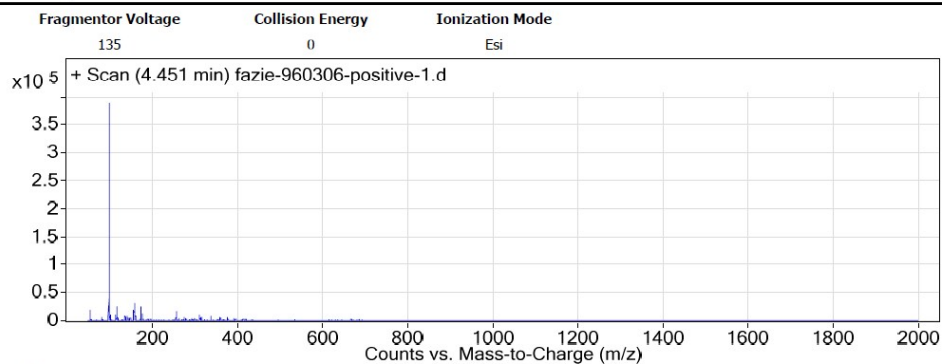

#### Peak List

| m/z  | Abund. |
|------|--------|
| 54.9 | 19567  |
| 98.9 | 388070 |
| 117  | 24638  |
| 159  | 31137  |
| 175  | 26207  |

Fragmentor Voltage 135    Collision Energy 0    Ionization Mode Esi

## Qualitative Analysis Report

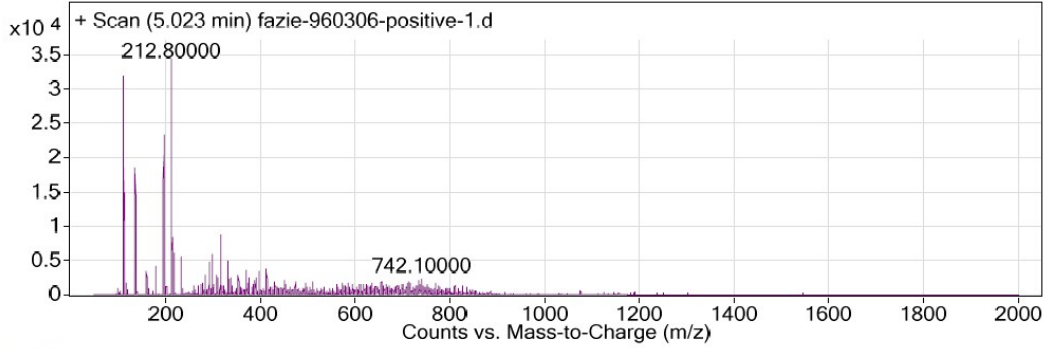

Peak List

| m/z   | Abund. |
|-------|--------|
| 112.9 | 31964  |
| 114.9 | 15020  |
| 136.9 | 18490  |
| 196.9 | 23428  |
| 212.8 | 35361  |
| 214.8 | 8490   |
| 218.9 | 6176   |
| 234.8 | 5618   |
| 300.9 | 5883   |
| 316.8 | 8884   |

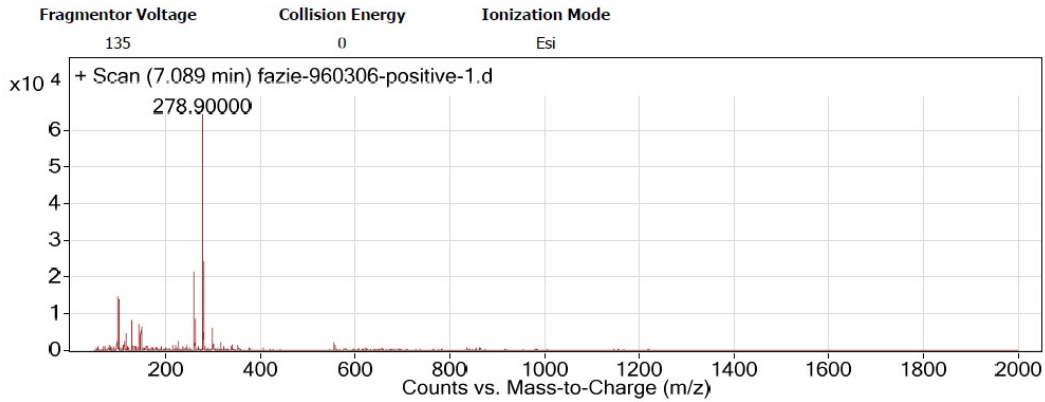

Peak List

| m/z   | z | Abund. |
|-------|---|--------|
| 98.9  |   | 14645  |
| 102.1 |   | 14137  |
| 130.2 |   | 8272   |
| 145   |   | 7150   |
| 149.1 |   | 6433   |
| 260.9 | 1 | 21560  |
| 262.9 | 1 | 8630   |
| 278.9 | 1 | 66152  |
| 279.9 | 1 | 7495   |
| 280.9 | 1 | 24498  |

# Qualitative Analysis Report

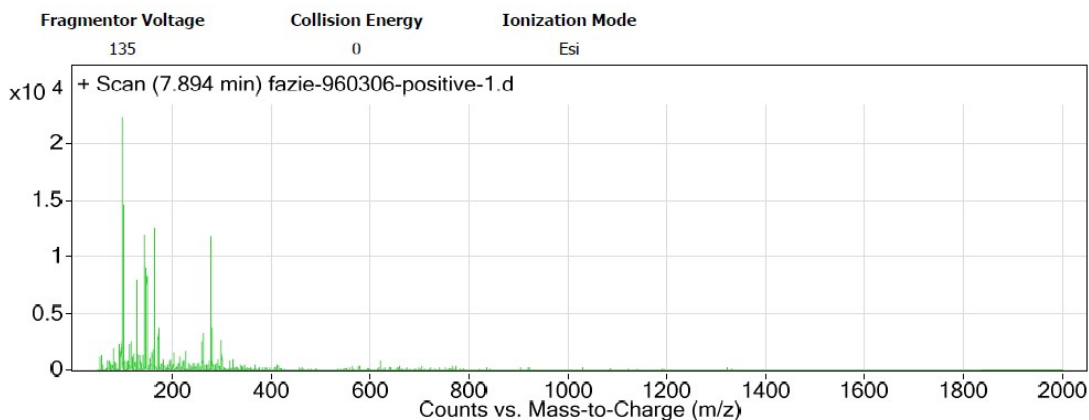

Peak List

| m/z   | z | Abund. |
|-------|---|--------|
| 99    |   | 22279  |
| 102.1 | 1 | 14539  |
| 130   | 1 | 7932   |
| 145   |   | 11981  |
| 147   |   | 8996   |
| 148   |   | 7910   |
| 149   |   | 8327   |
| 165.1 |   | 12549  |
| 279   |   | 11875  |
| 280.8 |   | 3773   |

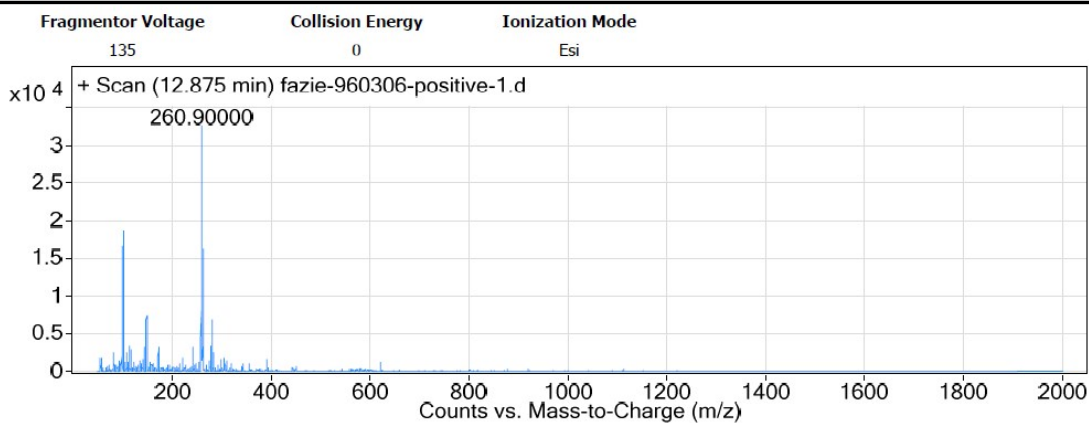

Peak List

| m/z   | z | Abund. |
|-------|---|--------|
| 99    | 1 | 16694  |
| 102.1 |   | 18767  |
| 114.9 |   | 3399   |
| 149   |   | 7434   |
| 259.9 |   | 28123  |
| 260.9 |   | 33521  |
| 261.9 |   | 18676  |
| 263   |   | 16393  |
| 277.8 |   | 3367   |









## Qualitative Analysis Report

| m/z   | Abund. |
|-------|--------|
| 278   | 15564  |
| 283   | 34278  |
| 284.2 | 5415   |
| 284.9 | 5469   |
| 305   | 17653  |

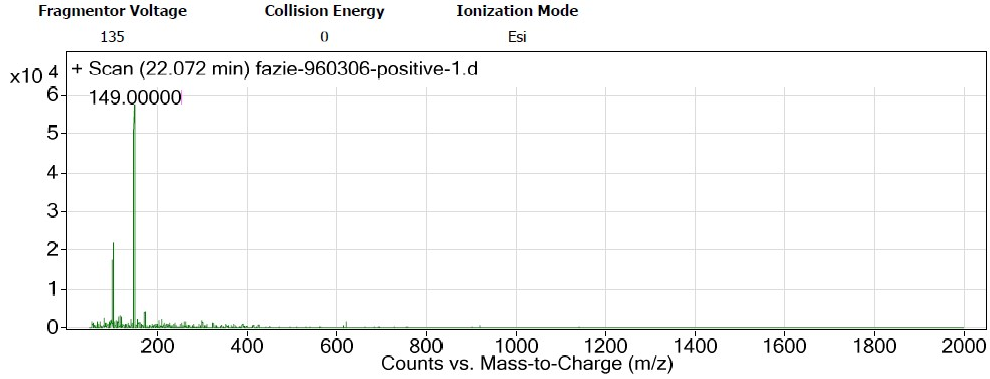

Peak List

| m/z   | Abund. |
|-------|--------|
| 99    | 17639  |
| 102.1 | 22062  |
| 118   | 3260   |
| 149   | 59026  |
| 150.1 | 6592   |
| 172.9 | 4082   |

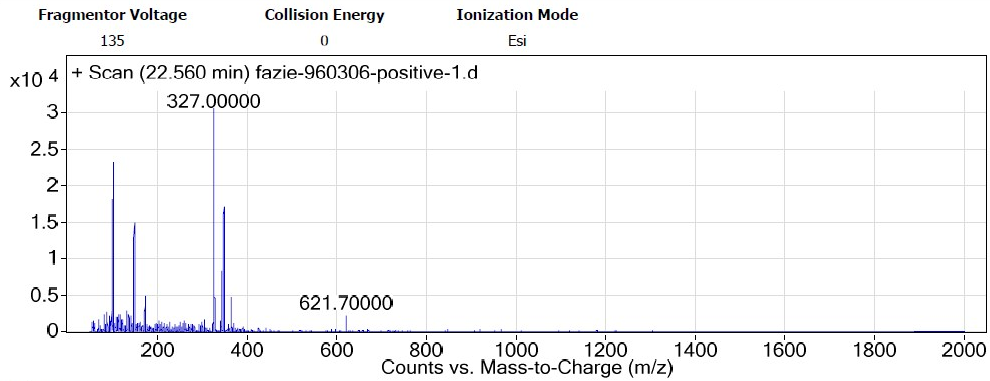

Peak List

| m/z   | z | Abund. |
|-------|---|--------|
| 99    |   | 18182  |
| 102.1 |   | 23201  |
| 102.9 |   | 3303   |
| 149   | 1 | 14897  |
| 173.1 |   | 4874   |
| 327   | 1 | 31320  |
| 328   | 1 | 4697   |



## Qualitative Analysis Report

| <i>m/z</i> | <i>z</i> | Abund. |
|------------|----------|--------|
| 173        |          | 4893   |
| 215        |          | 2937   |
| 217.2      |          | 13981  |
| 262.1      |          | 3216   |
| 340.1      | 1        | 8038   |

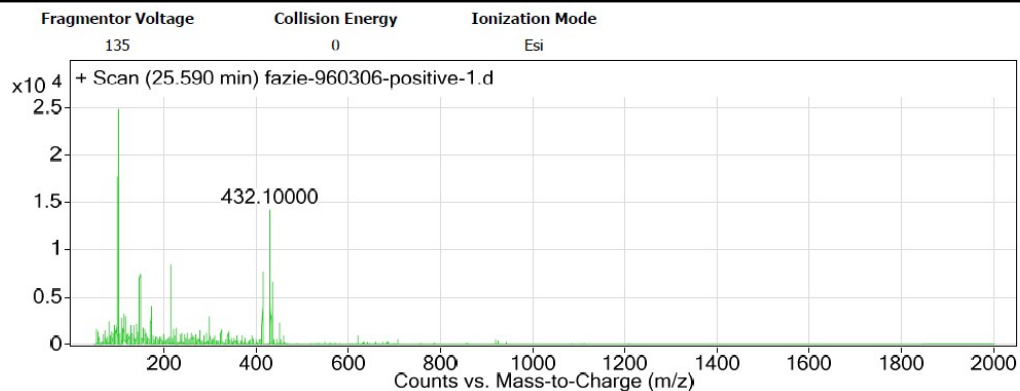

Peak List

| <i>m/z</i> | <i>z</i> | Abund. |
|------------|----------|--------|
| 98.9       | 1        | 17666  |
| 102.1      |          | 24780  |
| 114.1      |          | 3188   |
| 149        |          | 7338   |
| 173.1      |          | 3970   |
| 217.1      |          | 8477   |
| 415        |          | 7592   |
| 432.1      |          | 14170  |
| 432.9      |          | 3140   |
| 437.1      | 1        | 6532   |

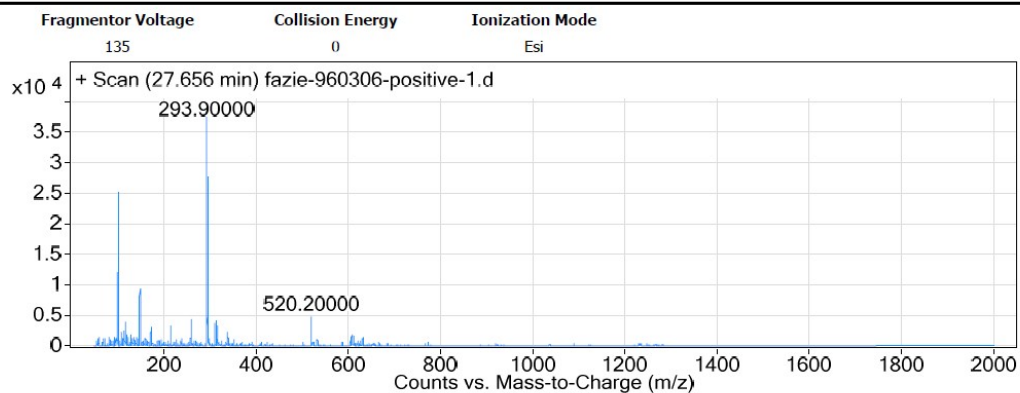

Peak List

| <i>m/z</i> | Abund. |
|------------|--------|
| 98.9       | 12000  |
| 102.1      | 25130  |
| 149        | 9331   |



## Qualitative Analysis Report

| <i>m/z</i> | <i>z</i> | Abund. |
|------------|----------|--------|
| 98.9       |          | 13140  |
| 102.1      |          | 28043  |
| 149        |          | 8531   |
| 171.1      | 1        | 72357  |
| 172.1      | 1        | 9221   |
| 173.1      | 1        | 6262   |
| 193.1      |          | 11686  |
| 219.1      |          | 5168   |
| 264.2      |          | 4266   |

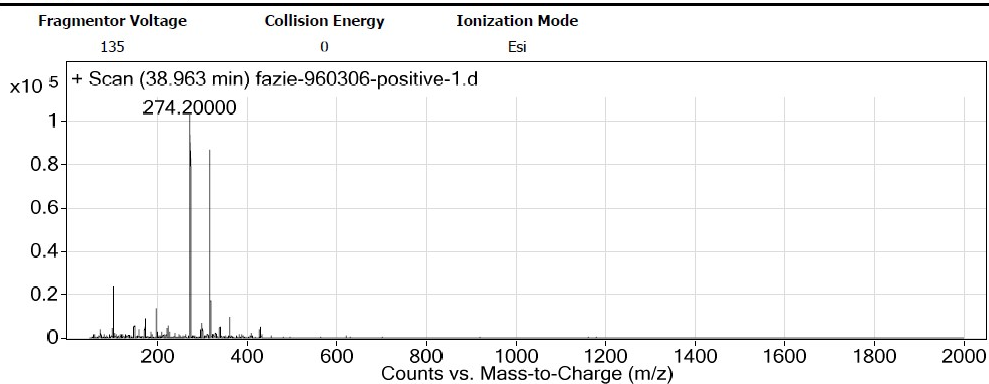

Peak List

| <i>m/z</i> | <i>z</i> | Abund. |
|------------|----------|--------|
| 102.1      |          | 24209  |
| 173.1      |          | 9372   |
| 199.1      |          | 13787  |
| 225        |          | 5963   |
| 274.2      |          | 105503 |
| 275.1      |          | 18461  |
| 301.1      |          | 6589   |
| 318.2      | 1        | 86649  |
| 319.2      | 1        | 17388  |
| 362.1      |          | 9625   |

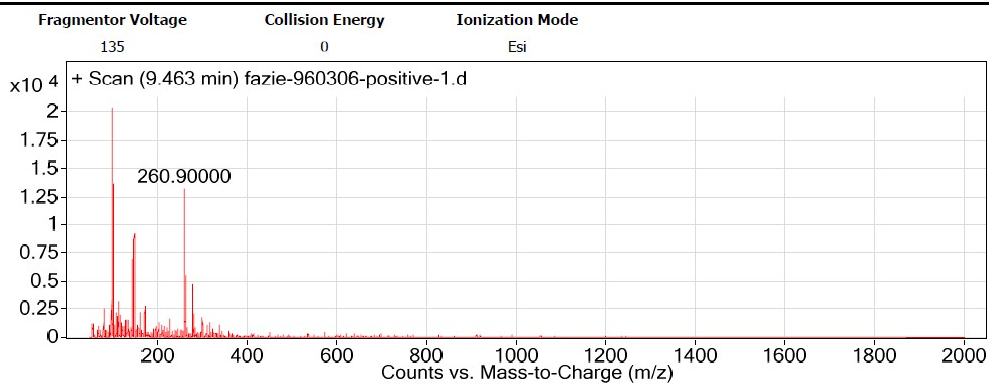

# Qualitative Analysis Report

Peak List

| <i>m/z</i> | <i>z</i> | Abund. |
|------------|----------|--------|
| 99         |          | 20350  |
| 102        | 1        | 13631  |
| 115        |          | 3218   |
| 145        |          | 6994   |
| 149        |          | 9253   |
| 173        |          | 2785   |
| 260.9      |          | 13222  |
| 262.1      |          | 2698   |
| 262.9      |          | 5485   |
| 278.9      |          | 4726   |

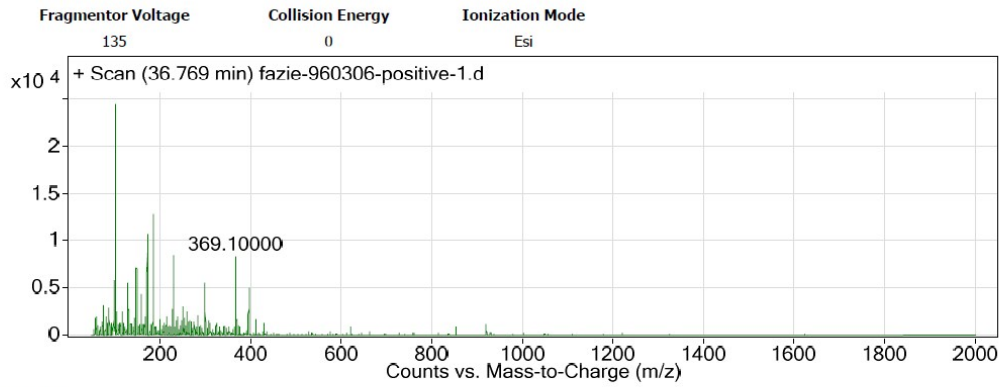

Peak List

| <i>m/z</i> | <i>z</i> | Abund. |
|------------|----------|--------|
| 98.9       |          | 5809   |
| 102.1      |          | 24434  |
| 129.1      |          | 5492   |
| 148.9      |          | 7119   |
| 173        |          | 10675  |
| 187.1      |          | 12818  |
| 231.1      | 1        | 8517   |
| 300.9      |          | 5502   |
| 369.1      |          | 8281   |
| 397.1      |          | 4987   |

--- End Of Report ---

**LC condition :**

Column: Eclipse XDB-C18(4.6 x150 mm , 5µm )  
Column temperature : 25°C  
Mobile phase : A= Water +0.1% acetic acid  
B= methanol  
Gradient

| Time(min e) | B% | Flow |
|-------------|----|------|
| 0           | 20 | 0.3  |
| 20          | 60 | 0.3  |
| 35          | 10 | 0.3  |
| 25          | 10 | 0.3  |

Flow rate: 0.3 ml/min  
Injection volumes: 10µL

**MS condition :**

Mode : negative ESI using the Agilent G6410 Triple Quadrapole Mass spectrometer

Nebulizer : 15 psi  
Drying gas flow : 6 ml/min  
V capillary : 4500V  
Drying gas temperature: 300°C  
Dwell time: 500msec  
Fragmentor : 135 v

# Qualitative Analysis Report

|                        |                                   |                               |                                 |
|------------------------|-----------------------------------|-------------------------------|---------------------------------|
| <b>Data Filename</b>   | fazei-negative-960226-gradian-1.d | <b>Sample Name</b>            | fazei-negative-960226-gradian-1 |
| <b>Sample Type</b>     | Sample                            | <b>Position</b>               | Vial 1                          |
| <b>Instrument Name</b> | Instrument 1                      | <b>User Name</b>              |                                 |
| <b>Acq Method</b>      |                                   | <b>IRM Calibration Status</b> | Success                         |
| <b>DA Method</b>       | Default.m                         | <b>Comment</b>                |                                 |

## User Chromatograms

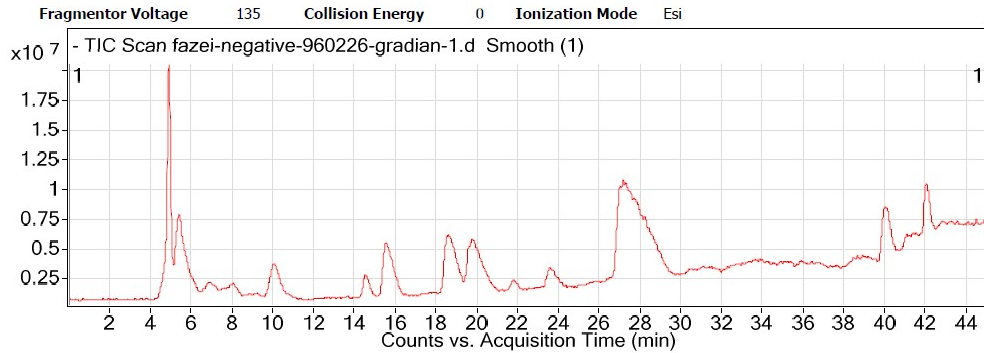

## User Spectra

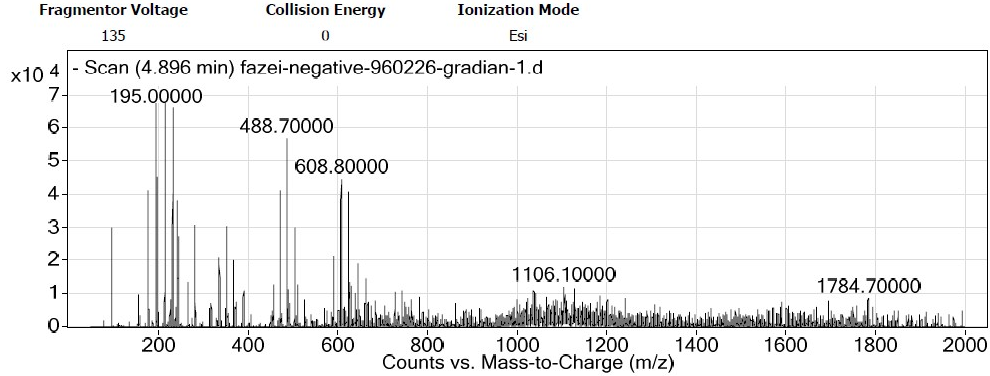

### Peak List

| m/z   | Abund. |
|-------|--------|
| 177   | 41269  |
| 195   | 69024  |
| 199   | 45363  |
| 216.9 | 68550  |
| 233   | 66279  |
| 244   | 38171  |
| 472.8 | 41057  |
| 488.7 | 56869  |
| 608.8 | 44566  |
| 624.7 | 40556  |

Fragmentor Voltage: 135    Collision Energy: 0    Ionization Mode: Esi



# Qualitative Analysis Report

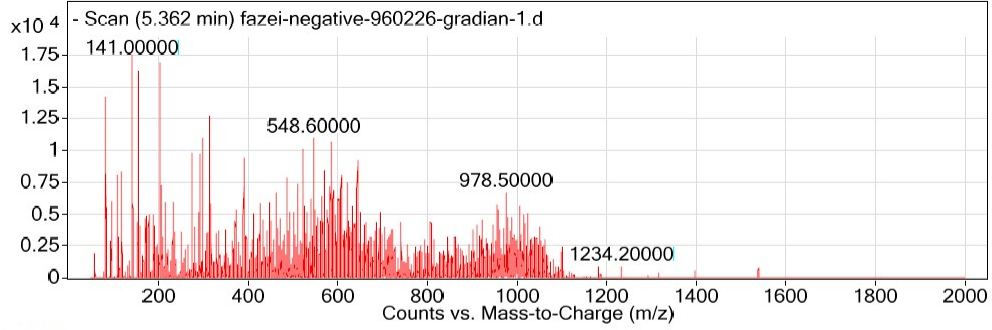

Peak List

| m/z   | Abund. |
|-------|--------|
| 82.9  | 14169  |
| 141   | 17945  |
| 157   | 16248  |
| 205   | 16916  |
| 276.8 | 9832   |
| 299   | 10952  |
| 314.9 | 12726  |
| 524.7 | 10088  |
| 548.6 | 10977  |
| 586.7 | 10717  |

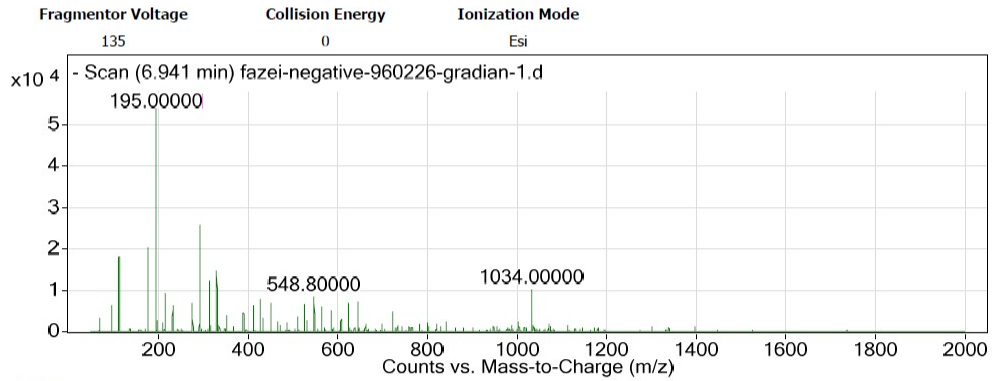

Peak List

| m/z   | Abund. |
|-------|--------|
| 113.1 | 17968  |
| 177   | 20356  |
| 195   | 55291  |
| 216.9 | 9129   |
| 292.8 | 25744  |
| 314.9 | 12153  |
| 330.9 | 14564  |
| 428.8 | 7771   |
| 548.8 | 8435   |
| 1034  | 10038  |

# Qualitative Analysis Report

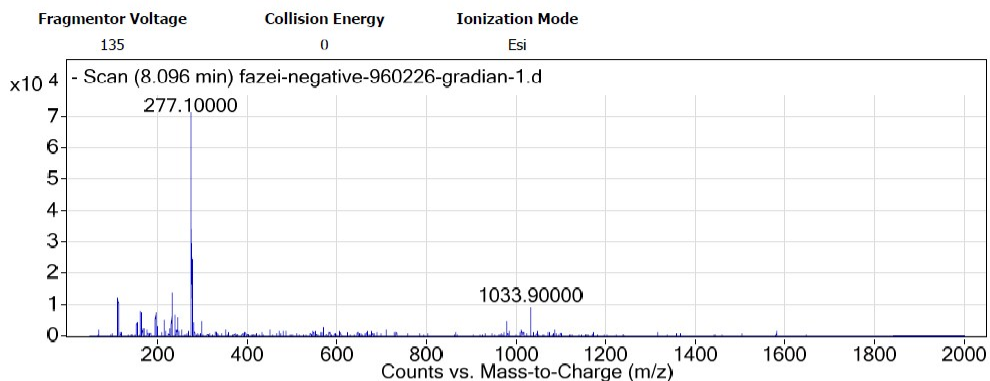

Peak List

| m/z    | z | Abund. |
|--------|---|--------|
| 112.9  |   | 12107  |
| 162.8  |   | 7694   |
| 165    |   | 7589   |
| 196.9  |   | 7359   |
| 233    |   | 13691  |
| 241    |   | 6773   |
| 277.1  | 1 | 72870  |
| 278.1  | 1 | 6891   |
| 279    |   | 24530  |
| 1033.9 |   | 9135   |

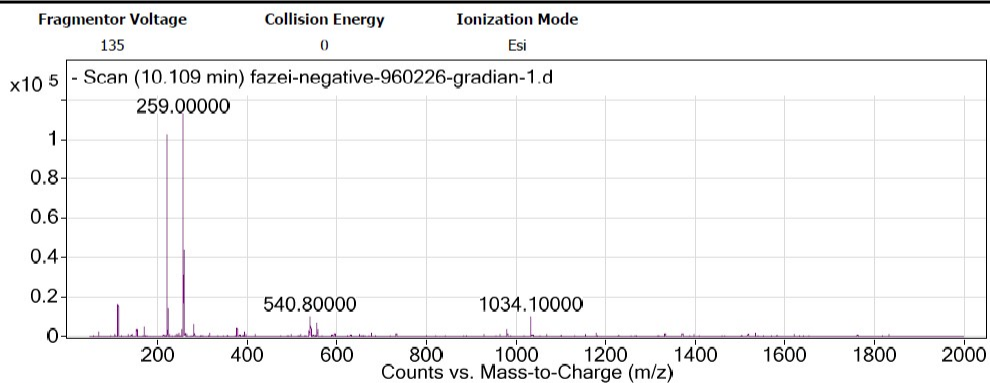

Peak List

| m/z   | z | Abund. |
|-------|---|--------|
| 113.1 |   | 16045  |
| 223   |   | 102225 |
| 223.9 |   | 14320  |
| 224.9 |   | 9045   |
| 258   |   | 65256  |
| 259   | 1 | 115924 |
| 260   | 1 | 43745  |
| 261.1 |   | 43957  |
| 540.8 |   | 10154  |

# Qualitative Analysis Report

| m/z    | z | Abund. |
|--------|---|--------|
| 1034.1 |   | 9757   |

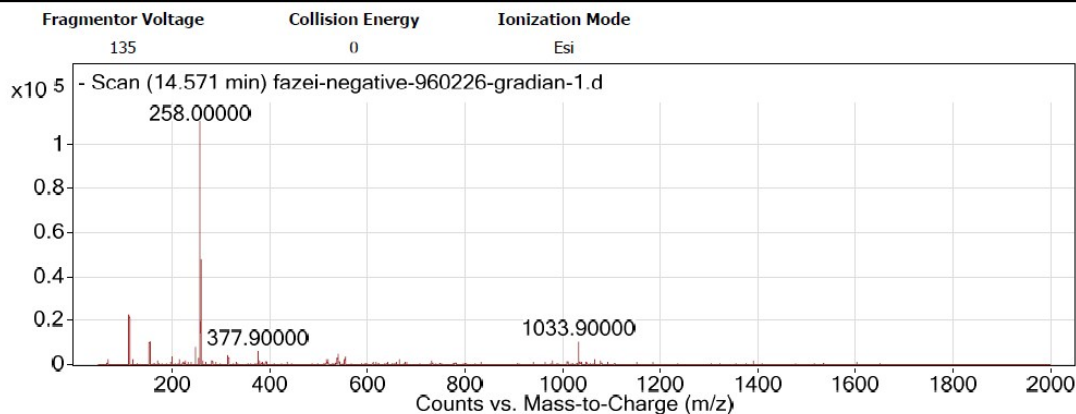

Peak List

| m/z    | Abund. |
|--------|--------|
| 113.1  | 22669  |
| 155    | 10174  |
| 248.7  | 8110   |
| 258    | 113093 |
| 259.1  | 56953  |
| 260    | 47545  |
| 261.1  | 19556  |
| 377.9  | 6060   |
| 1033.9 | 10659  |

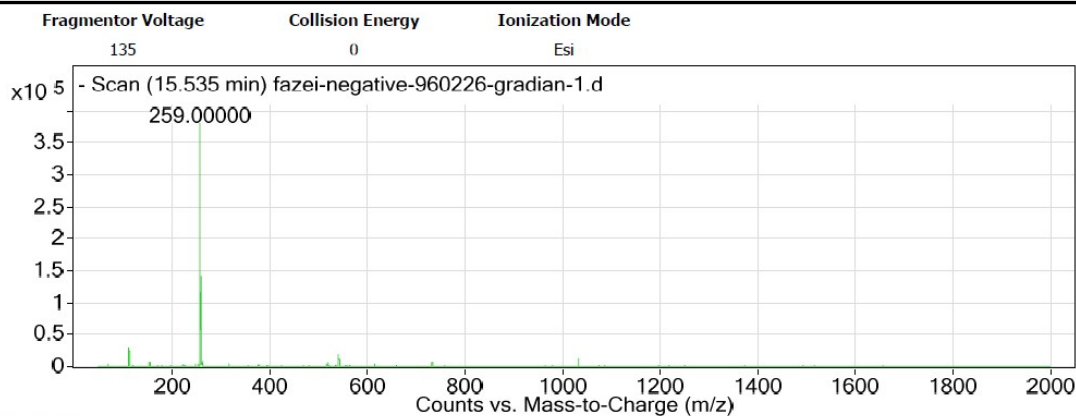

Peak List

| m/z   | Abund. |
|-------|--------|
| 112.9 | 29520  |
| 259   | 390402 |
| 259.9 | 38588  |
| 261   | 142334 |

Fragmentor Voltage: 135      Collision Energy: 0      Ionization Mode: Esi





## Qualitative Analysis Report

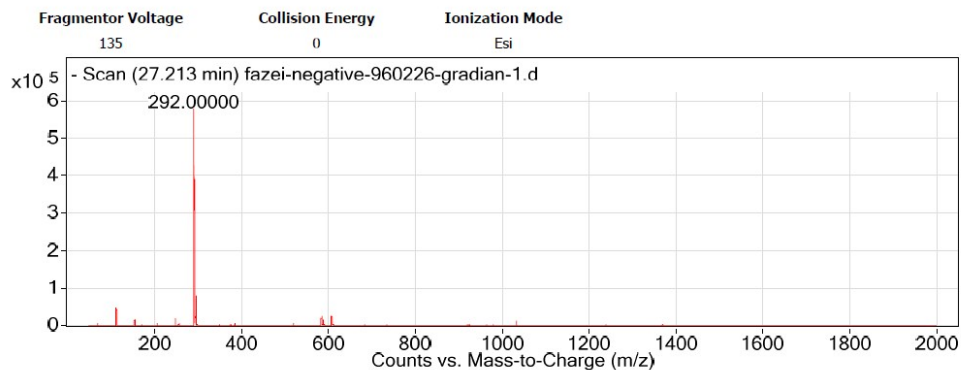

Peak List

| m/z   | Abund. |
|-------|--------|
| 113   | 48113  |
| 292   | 592630 |
| 293.1 | 58964  |
| 294   | 391822 |
| 294.9 | 41253  |
| 295.9 | 78613  |

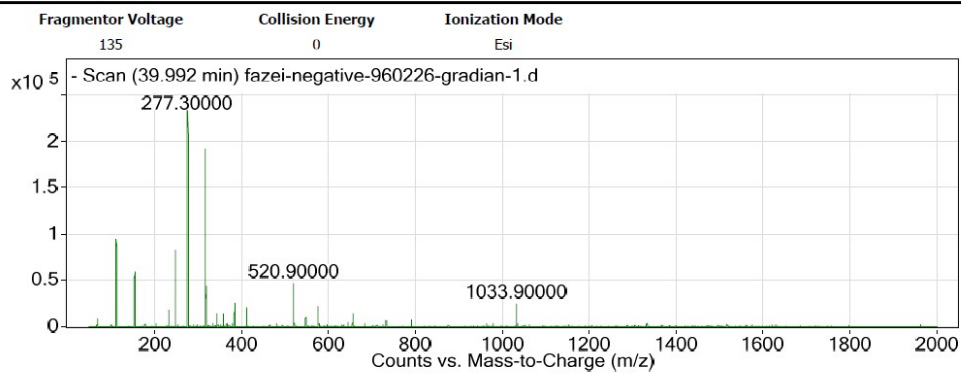

Peak List

| m/z    | Abund. |
|--------|--------|
| 113.1  | 94449  |
| 155.1  | 59152  |
| 248.9  | 83113  |
| 277.3  | 239451 |
| 278.2  | 44844  |
| 318.3  | 192262 |
| 319.4  | 43788  |
| 385    | 25701  |
| 520.9  | 46814  |
| 1033.9 | 24355  |

Fragmentor Voltage: 135      Collision Energy: 0      Ionization Mode: Esi

# Qualitative Analysis Report

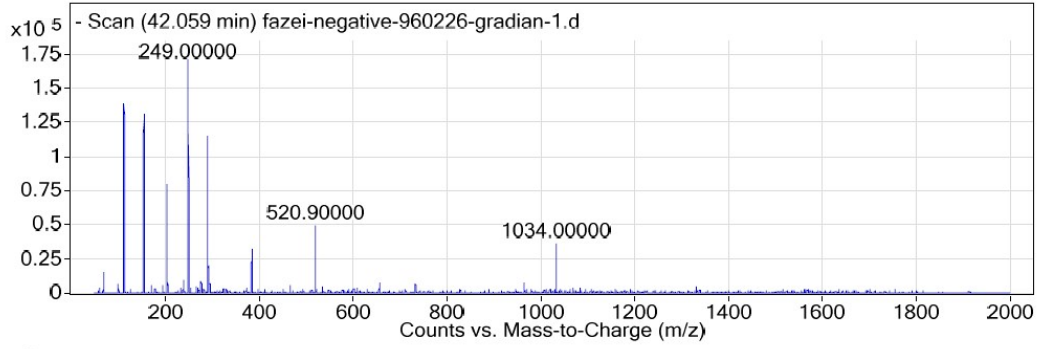

Peak List

| <b>m/z</b> | <b>Abund.</b> |
|------------|---------------|
| 111.1      | 26985         |
| 113.1      | 138456        |
| 155.1      | 130856        |
| 205.2      | 79390         |
| 249        | 175415        |
| 250.2      | 160614        |
| 291.2      | 114963        |
| 385.1      | 32258         |
| 520.9      | 49429         |
| 1034       | 36334         |

--- End Of Report ---
